# Supplementary material for: Use of the Distal Facial Artery (Angular Artery) for Supermicrosurgical Midface Reconstruction
Source: PubMed Central journal article supplement (PMC6416107; doi:10.1097/gox.0000000000001978), 2019-02-05
Supplement: gox-7-e1978-s002.pdf [file gox-7-e1978-s002.pdf]

## Patients' Demographic Data and Reconstruction Summary

| Patient | Age (yr) | Sex    | Preoperative diagnosis                            | Cause of defect     | Diameter of the angular artery (mm) | Type of free flap                          | Size of skin paddle (cm) | Diameter of pedicle artery (mm) | Recipient vein used    | Number and type of vein grafts for venous drainage | Number of vein grafts for arterial anastomosis | Flap complications | Follow-up Length (months) | Flap survival |
|---------|----------|--------|---------------------------------------------------|---------------------|-------------------------------------|--------------------------------------------|--------------------------|---------------------------------|------------------------|----------------------------------------------------|------------------------------------------------|--------------------|---------------------------|---------------|
| 1       | 62       | Female | Nasal carcinoma                                   | Malignant tumor     | 1.0                                 | Helical rim flap                           | 3 x 2                    | 1.5                             | Facial vein            | 1, lower leg, Y-shaped                             | 1                                              | Congestion         | 15                        | Complete      |
| 2       | 23       | Male   | Skin defect of the nose                           | Trauma              | 0.8                                 | Posterior auricular artery perforator flap | 4 x 1.5                  | 1.2                             | Subcutaneous veins (2) | 1, dorsum of the foot                              | 0                                              | Congestion         | 8                         | Complete      |
| 3       | 65       | Male   | Nasal carcinoma                                   | Malignant tumor     | 0.7                                 | SCIP flap                                  | 10 x 7                   | 0.8                             | Facial vein            | 1, lower leg, Y-shaped                             | 0                                              | None               | 10                        | Complete      |
| 4       | 41       | Male   | Nasal carcinoma                                   | Malignant tumor     | 1.0                                 | SCIP flap                                  | 1 x 2                    | 1.0                             | Facial vein            | 1, lower leg, Y-shaped                             | 0                                              | None               | 9                         | Complete      |
| 5       | 68       | Female | Maxillary carcinoma                               | Malignant tumor     | 0.8                                 | SCIP flap                                  | 19 x 9                   | 0.8                             | Angular vein           | 0                                                  | 0                                              | None               | 15                        | Complete      |
| 6       | 69       | Male   | Nasal carcinoma                                   | Malignant tumor     | 0.8                                 | SCIP flap                                  | 7 x 2                    | 0.8                             | Angular vein           | 0                                                  | 0                                              | None               | 59                        | Complete      |
| 7       | 64       | Female | Contracture of the lateral commissure of the lips | Burn                | 1.0                                 | 1st web space flap                         | 5 x 3                    | 1.0                             | Facial vein            | 0                                                  | 0                                              | None               | 10                        | Complete      |
| 8       | 48       | Female | Infraorbital nerve damage                         | Old zygoma fracture | 1.0                                 | SCIP-LFCN flap                             | 0                        | 0.8                             | Angular vein           | 0                                                  | 0                                              | None               | 13                        | Complete      |
| 9       | 35       | Female | Infraorbital nerve damage                         | Old zygoma fracture | 0.8                                 | SCIP-LFCN flap                             | 0                        | 0.8                             | Angular vein           | 0                                                  | 0                                              | None               | 8                         | Complete      |
| Average |          |        |                                                   |                     | 51.8                                | 0.9                                        |                          | 1.0                             |                        |                                                    |                                                |                    | 16.3                      |               |
| Range   |          |        |                                                   |                     | 23-89                               | 0.7-1.0                                    |                          | 0.8-1.5                         |                        |                                                    |                                                |                    | 8-59                      |               |

SCIP, superficial circumflex iliac artery perforator

LFCN, lateral femoral cutaneous nerve
